# Supplementary material for: Identification of Genetic Variants Associated with Sex-Specific Lung-Cancer Risk
Source: MDPI journal article supplement (doi:10.3390/cancers13246379), 2021-12-20
Supplement: s1 [file s1]

**Table S1.** Genotype of peak SNPs by family history

|             | Allele       | no FH | FH | P    |
|-------------|--------------|-------|----|------|
| rs6529797   | Major Allele | 208   | 37 | 0.5  |
|             | Risk Allele  | 43    | 5  |      |
| rs17313971  | Major Allele | 213   | 36 | 1    |
|             | Risk Allele  | 38    | 6  |      |
| rs7883926   | Minor Allele | 0     | 0  | NA   |
|             | Risk Allele  | 251   | 42 |      |
| rs55803048  | Major Allele | 206   | 32 | 0.39 |
|             | Risk Allele  | 45    | 10 |      |
| rs145211462 | Minor Allele | 10    | 1  | 1    |
|             | Risk Allele  | 241   | 41 |      |
| rs62601607  | Major Allele | 214   | 35 | 0.82 |
|             | Risk Allele  | 37    | 7  |      |

\*FH: Family history. Only 293 patients were included in this analysis, as 20 patients with incomplete family history.
