# Supplementary figures and images for: Identification of Genetic Variants Associated with Sex-Specific Lung-Cancer Risk
Source: MDPI journal article supplement (doi:10.3390/cancers13246379), 2021-12-20

## LUAD

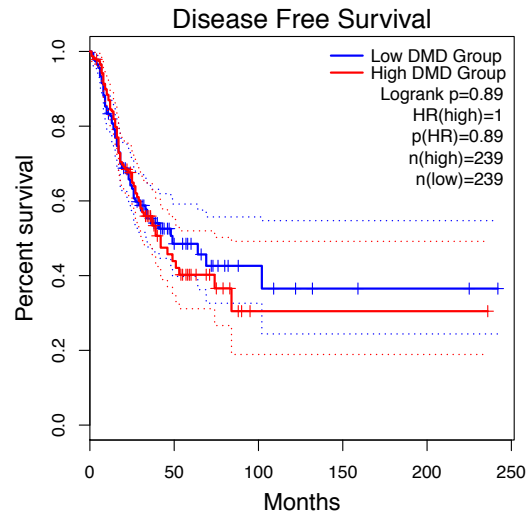

## LUSC

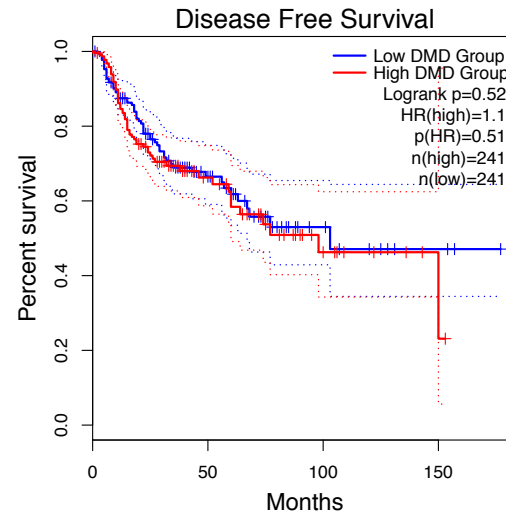

## LUAD+LUSC

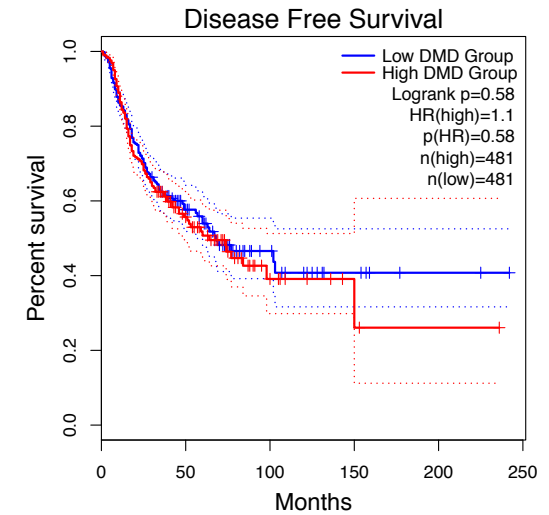

## Overall Survival

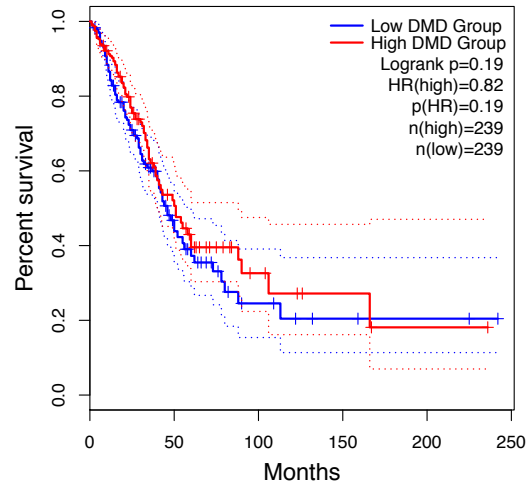

## Overall Survival

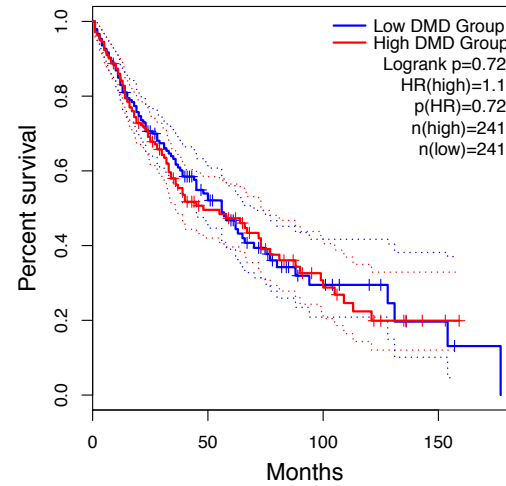

## Overall Survival

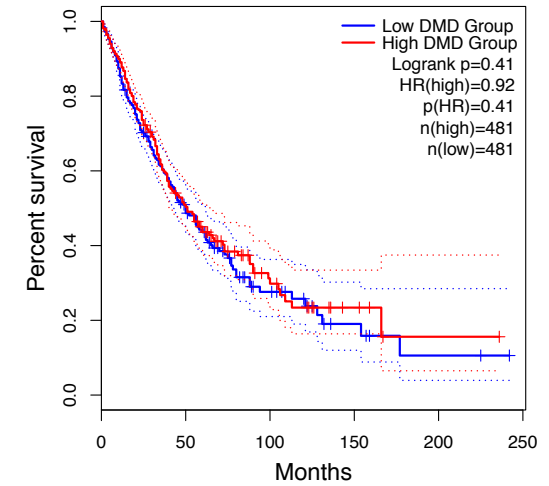

Supplement: s1 [file s1]
